# Supplementary material for: Reconstruction after Talar Tumor Resection: A Systematic Review
Source: MDPI journal article supplement (doi:10.3390/curroncol29120769), 2022-12-12
Supplement: s1 [file s1]

Supplementary material Table S1: Search strategy.

2022/1/19

| # PubMed | Literature search                                                                                                                                                                                       | Result    |
|----------|---------------------------------------------------------------------------------------------------------------------------------------------------------------------------------------------------------|-----------|
| 1        | talus[tw] OR talar[tw]                                                                                                                                                                                  | 8,530     |
| 2        | tumo*[tw] OR cancer*[tw] OR neoplasm*[tw] OR osteosarcoma*[tw]<br>OR osteoblastoma*[tw] OR osteochondroma*[tw] OR<br>chondroblastoma*[tw] OR chondrosarcoma*[tw] OR chondroma*[tw]<br>OR oncologic*[tw] | 4,331,033 |
| 3        | #1 and #2                                                                                                                                                                                               | 501       |
| 4        | "Bone Neoplasms/surgery"[mh] AND "Talus/surgery"[mh]                                                                                                                                                    | 66        |
| 5        | #3 or #4                                                                                                                                                                                                | 501       |
| 6        | "Reconstructive Surgical Procedures"[mh] OR reconstruct*[tw] OR<br>repair*[tw] OR prosthesis*[tw] OR replace*[tw] OR substitute*[tw]                                                                    | 1,621,155 |
| 7        | #5 and #6                                                                                                                                                                                               | 66        |

Embase

2022/1/19

| Set# | Searched for                                                                                                                                                   | Results  |
|------|----------------------------------------------------------------------------------------------------------------------------------------------------------------|----------|
| S1   | (talus OR talar)                                                                                                                                               | 11958*   |
| S2   | (tumo* OR cancer* OR neoplasm* OR osteosarcoma* OR<br>osteoblastoma* OR osteochondroma* OR chondroblastoma* OR<br>chondrosarcoma* OR chondroma* OR oncologic*) | 6844161* |
| S3   | (S1 and S2)                                                                                                                                                    | 994°     |
| S4   | EMB.EXACT.EXPLODE("talus") AND<br>(EMB.EXACT.EXPLODE("bone tumor -- surgery"))                                                                                 | 168°     |
| S5   | (S3 or S4)                                                                                                                                                     | 1006°    |
| S6   | (EMB.EXACT.EXPLODE("reconstructive surgery")) OR<br>(reconstruct* OR repair* OR prosthesis* OR replace* OR substitute*)                                        | 2215667* |
| S7   | (S5 and S6)                                                                                                                                                    | 129°     |

Central

2022/1/19

| ID | Search                                                                                                                                                                  | Hits   |
|----|-------------------------------------------------------------------------------------------------------------------------------------------------------------------------|--------|
| #1 | (talus OR talar):ti,ab,kw                                                                                                                                               | 259    |
| #2 | (tumo* OR cancer* OR neoplasm* OR osteosarcoma* OR<br>osteoblastoma* OR osteochondroma* OR chondroblastoma* OR<br>chondrosarcoma* OR chondroma* OR oncologic*):ti,ab,kw | 222703 |

|    |                                                                                                                               |       |
|----|-------------------------------------------------------------------------------------------------------------------------------|-------|
| #3 | #1 and #2                                                                                                                     | 8     |
| #4 | [mh "Bone Neoplasms"/SU] AND [mh "Talus"/SU]                                                                                  | 0     |
| #5 | #3 or #4                                                                                                                      | 8     |
| #6 | ([mh "Reconstructive Surgical Procedures"]) OR ((reconstruct* OR repair* OR prosthesis* OR replace* OR substitute*):ti,ab,kw) | 82247 |
| #7 | #5 and #6                                                                                                                     | 2     |
| #8 | #5 and #6 in Cochrane Reviews, Cochrane Protocols                                                                             | 0     |
| #9 | #5 and #6 in Trials                                                                                                           | 2     |
